# Supplementary material for: Development of molecularly imprinted electrochemical sensors based on Fe3O4@MWNT-COOH/CS nanocomposite layers for detecting traces of acephate and trichlorfon
Source: Royal Society of Chemistry journal article supplement (doi:10.1039/c4an01514b), 2014-01-01
Supplement: c4an01514b1.pdf [file c4an01514b1.pdf]

**Development of molecularly imprinted electrochemical sensors based  
on Fe<sub>3</sub>O<sub>4</sub>@MWNTs-COOH/CS nanocomposite layers for detecting  
traces of acephate and trichlorfon**

Qinghua Tang,<sup>a</sup> Xiujuan Shi,<sup>a</sup> Xiaolin Hou,<sup>a</sup> Jie Zhou<sup>b</sup> and Zhixiang Xu<sup>\*a</sup>

<sup>a</sup> *College of Food Science and Engineering, Shandong Agricultural University, Tai'an 271018,*

*China*

<sup>b</sup> *College of Chemistry and Material Science, Shandong Agricultural University, Tai'an 271018,*

*China*

\*Correspondence: Zhixiang Xu

Tel: (86 538) 824 6021

Fax: (86 538) 824 2482

E-mail: zhixiangxu@sina.com

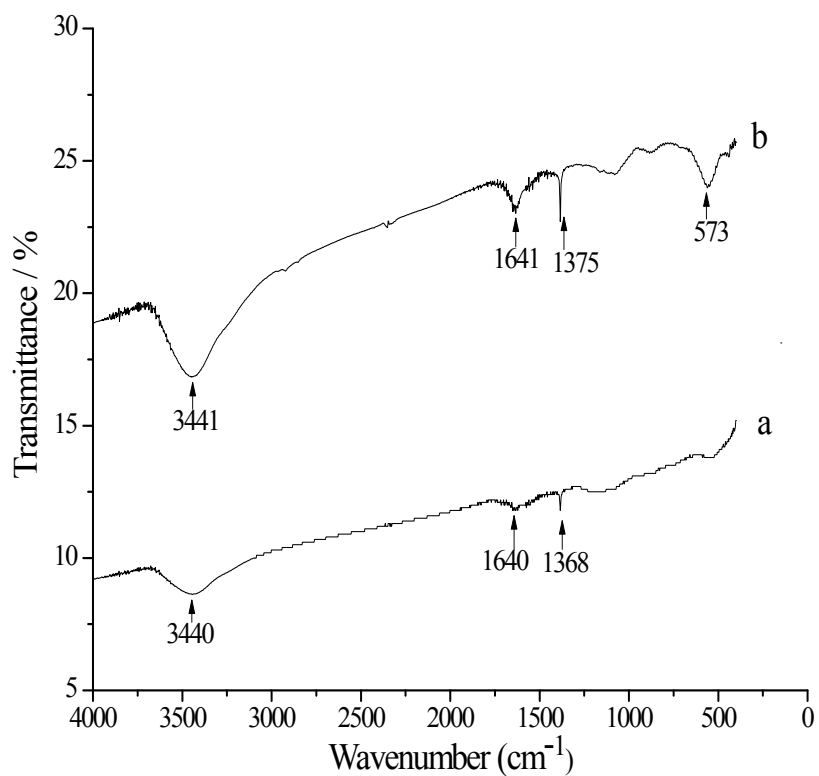

**Fig. S1.** FT-IR spectra of MWNTs-COOH (a) and  $\text{Fe}_3\text{O}_4$ @MWNTs-COOH (b)

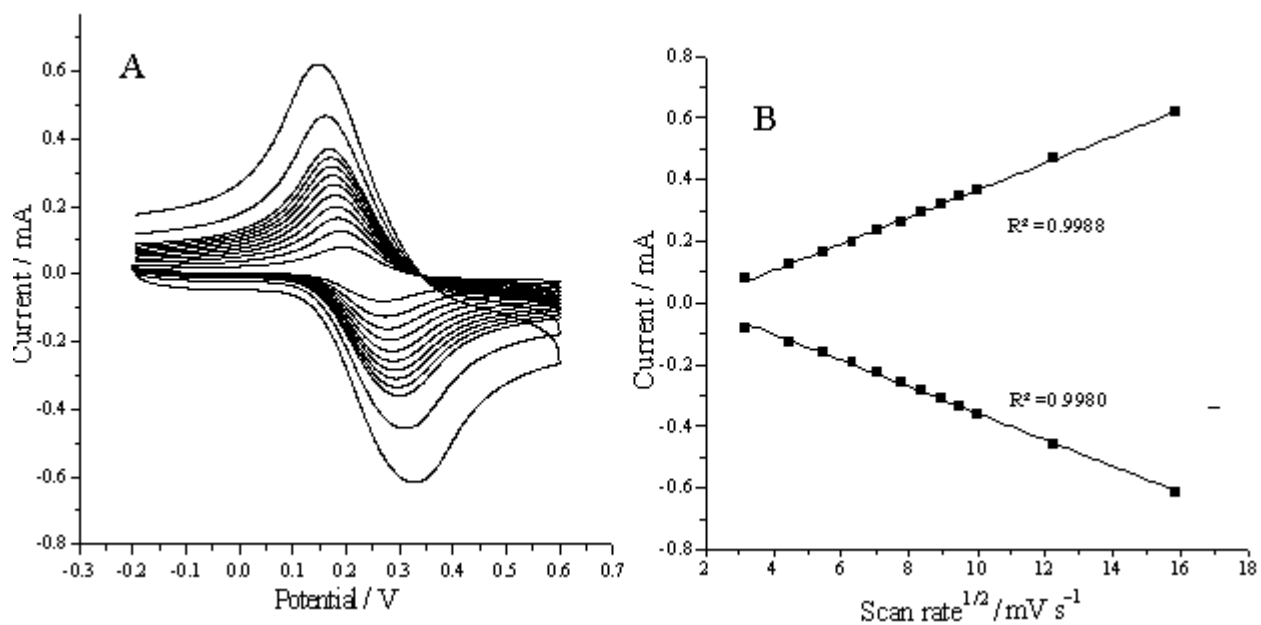

**Fig. S2.** (A) CV curves of MIP/ $\text{Fe}_3\text{O}_4$ @MWNTs-COOH/CS/GCE at different scan rates (from inner to outer): 10, 20, 30, 40, 50, 60, 70, 80, 90, 100, 150, 200 and 250  $\text{mV s}^{-1}$  in the ORPS. (B)

The relationship between the scan rate and anodic ( $I_{pa}$ ), cathodic ( $I_{pc}$ ).

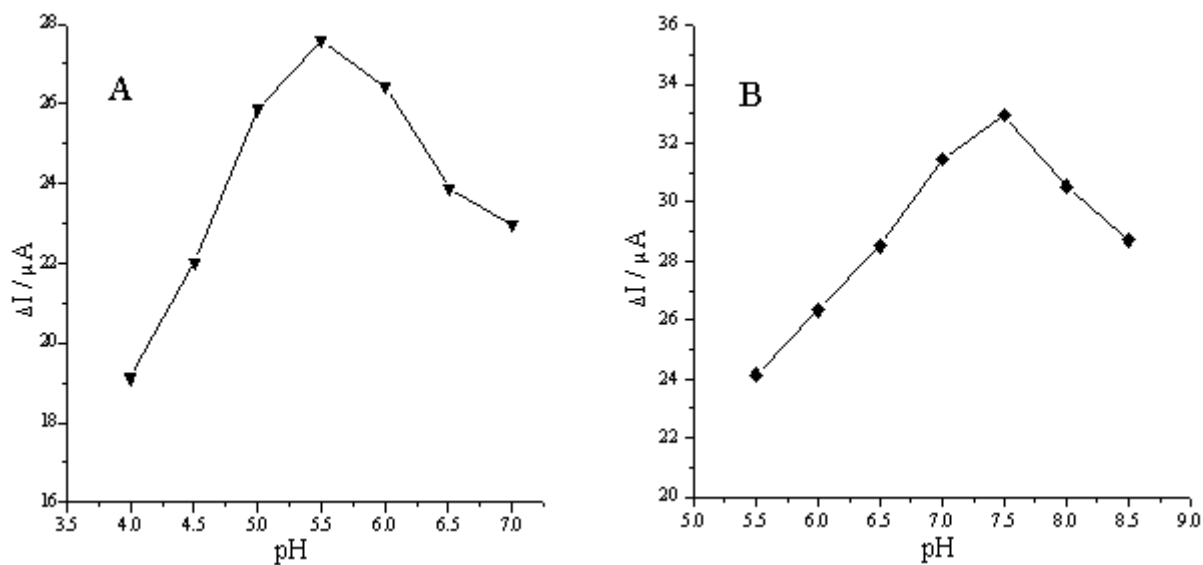

**Fig. S3.** The influences of the pH of the PBS on the current responses of MIP/Fe<sub>3</sub>O<sub>4</sub>@MWNTs-COOH/CS/GCE for acephate (A) and trichlorfon (B).

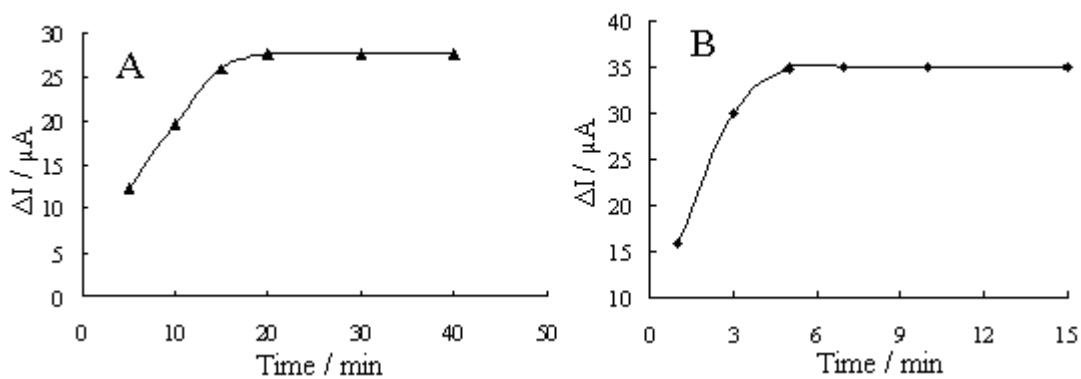

**Fig. S4.** The influences of accumulation times on the response current of MIP/Fe<sub>3</sub>O<sub>4</sub>@MWNTs-COOH/CS/GCE for acephate (A) and trichlorfon (B).

**Table S1** Repeatability experiments of the MIP sensor.

|                      | 1     | 2     | 3     | 4     | 5     | RSD   |
|----------------------|-------|-------|-------|-------|-------|-------|
| Current (- $\mu A$ ) | 34.82 | 34.07 | 33.41 | 32.40 | 32.62 | 3.01% |

**Table S1** The fabrication reproducibility experiments of the MIP sensor.

|                     | 1     | 2     | 3     | 4     | 5     | 6     | RSD   |
|---------------------|-------|-------|-------|-------|-------|-------|-------|
| Current (- $\mu$ A) | 33.45 | 36.75 | 34.42 | 33.96 | 32.39 | 35.12 | 4.35% |
